# Supplementary material for: Presence of Endangered Red-Crowned Parrots (Amazona viridigenalis) Depends on Urban Landscapes
Source: MDPI journal article supplement (doi:10.3390/d15070878), 2023-07-23
Supplement: s1 [file s1]

Archive with 1 entries (1 files):
- diversity-2486903-supplementary.pdf
