# Supplementary material for: Presence of Endangered Red-Crowned Parrots (Amazona viridigenalis) Depends on Urban Landscapes
Source: MDPI journal article supplement (doi:10.3390/d15070878), 2023-07-23
Supplement: s1 [file s1 › diversity-2486903-supplementary.pdf]

**Table S1.** Climatic and environmental variables included in all Maxent models, including a description of the variable and units, if applicable. Variables and descriptions of climatic data from Fick and Hijmans [42]. All bioclimatic data (Bio“xx”) are representative of the averages from the years 1970–2000.

| Variable           | Description                                                                           | Detailed Description                                                                                                                                                                                                                                                                                        | Unit                    |
|--------------------|---------------------------------------------------------------------------------------|-------------------------------------------------------------------------------------------------------------------------------------------------------------------------------------------------------------------------------------------------------------------------------------------------------------|-------------------------|
| Bio1               | Annual Mean Temperature.                                                              | The annual mean temperature.                                                                                                                                                                                                                                                                                | °C                      |
| Bio2               | Mean Diurnal Range (Mean of monthly (max temp–min temp)).                             | The mean of the monthly temperature ranges (monthly maximum minus monthly minimum).                                                                                                                                                                                                                         | °C                      |
| Bio3               | Isothermality (BIO2/BIO7) (×100).                                                     | Isothermality quantifies how large the day to-night temperatures oscillate relative to the summer to-winter (annual) oscillations.                                                                                                                                                                          | %                       |
| Bio4               | Temperature Seasonality (standard deviation × 100).                                   | The amount of temperature variation over a given year (or averaged years) based on the standard deviation (variation) of monthly temperature averages.                                                                                                                                                      | %                       |
| Bio5               | Max Temperature of Warmest Month.                                                     | The maximum monthly temperature occurrence over a given year (time-series) or averaged span of years (normal).                                                                                                                                                                                              | °C                      |
| Bio6               | Min Temperature of Coldest Month.                                                     | The minimum monthly temperature occurrence over a given year (time-series) or averaged span of years (normal).                                                                                                                                                                                              | °C                      |
| Bio7               | Temperature Annual Range (BIO5–BIO6).                                                 | A measure of temperature variation over an annual period.                                                                                                                                                                                                                                                   | °C                      |
| Bio8               | Mean Temperature of Wettest Quarter.                                                  | This quarterly index approximates mean temperatures that prevail during the wettest season.                                                                                                                                                                                                                 | °C                      |
| Bio9               | Mean Temperature of Driest Quarter.                                                   | This quarterly index approximates mean temperatures that prevail during the driest quarter.                                                                                                                                                                                                                 | °C                      |
| Bio10              | Mean Temperature of Warmest Quarter.                                                  | This quarterly index approximates mean temperatures that prevail during the warmest quarter.                                                                                                                                                                                                                | °C                      |
| Bio11              | Mean Temperature of Coldest Quarter.                                                  | This quarterly index approximates mean temperatures that prevail during the coldest quarter.                                                                                                                                                                                                                | °C                      |
| Bio12              | Annual Precipitation.                                                                 | This is the sum of all total monthly precipitation values.                                                                                                                                                                                                                                                  | mm                      |
| Bio13              | Precipitation of Wettest Month.                                                       | This index identifies the total precipitation that prevails during the wettest month.                                                                                                                                                                                                                       | mm                      |
| Bio14              | Precipitation of Driest Month.                                                        | This index identifies the total precipitation that prevails during the driest month.                                                                                                                                                                                                                        | mm                      |
| Bio15              | Precipitation Seasonality (Coefficient of Variation).                                 | This is a measure of the variation in monthly precipitation totals over the course of the year. This index is the ratio of the standard deviation of the monthly total precipitation to the mean monthly total precipitation (also known as the coefficient of variation) and is expressed as a percentage. | %                       |
| Bio16              | Precipitation of Wettest Quarter.                                                     | This quarterly index approximates total precipitation that prevails during the wettest quarter.                                                                                                                                                                                                             | mm                      |
| Bio17              | Precipitation of Driest Quarter.                                                      | This quarterly index approximates total precipitation that prevails during the driest quarter.                                                                                                                                                                                                              | mm                      |
| Bio18              | Precipitation of Warmest Quarter.                                                     | This quarterly index approximates total precipitation that prevails during the warmest quarter.                                                                                                                                                                                                             | mm                      |
| Bio19              | Precipitation of Coldest Quarter.                                                     | This quarterly index approximates total precipitation that prevails during the coldest quarter.                                                                                                                                                                                                             | mm                      |
| Population_Density | Human population density.                                                             | Human population density during 2015 as 30 arc-second resolution.                                                                                                                                                                                                                                           | Persons/km <sup>2</sup> |
| GAP/LANDFIRE       | Thematic land cover map representing ecological systems throughout the continuous US. | The map legend includes types described by NatureServe's Ecological Systems Classification [46] as well as land use classes described in the National Land Cover Dataset 2011                                                                                                                               |                         |

|                      |                                                                                                                                                                                        |                                                                                                                                                                                                                                                                                                                        |  |
|----------------------|----------------------------------------------------------------------------------------------------------------------------------------------------------------------------------------|------------------------------------------------------------------------------------------------------------------------------------------------------------------------------------------------------------------------------------------------------------------------------------------------------------------------|--|
|                      |                                                                                                                                                                                        | [47]. These data cover the entire continental U.S. and are a continuous data layer. These raster data have a 30 m × 30 m cell resolution. [45]                                                                                                                                                                         |  |
| NLCD_2016_LandCover  | Details land cover throughout the continuous US. Includes layers for open water, urban intensities, barren land, forest types, shrublands, grassland types, wetlands, and agriculture. | The National Land Cover Database (NLCD) provides nationwide data on land cover and land cover change at a 30 m resolution with a 16-class legend based on a modified Anderson Level II classification system.                                                                                                          |  |
| NLCD_2016_Impervious | Details impervious surfaces (roads, homes, etc.) throughout the continuous US.                                                                                                         | NLCD imperviousness products represent urban impervious surfaces as a percentage of developed surface over every 30-meter pixel in the United States.                                                                                                                                                                  |  |
| NLCD_2016_TreeCanopy | Details tree canopy coverage throughout the continuous US.                                                                                                                             | These data contain percent tree canopy estimates, as a continuous variable, for each pixel across all land covers and types and are generated by the United States Forest Service (USFS). The USFS derives tree canopy cover from multi-spectral Landsat imagery and other available ground and ancillary information. |  |
| NDVI_2020            | Details living vegetation throughout the continuous US.                                                                                                                                | A normalized difference vegetation index assessing living vegetation throughout the continuous United States in early 2020.                                                                                                                                                                                            |  |

**Table S2.** AUCs (Area under the ROC (receiver operating characteristic) Curve) for each model, using model performance standards defined by Hosmer Jr. et al. [60]).

| Model      | AUC Training Average | AUC Test Average | Model Performance |
|------------|----------------------|------------------|-------------------|
| California | 0.935                | 0.935            | Very Good         |
| Texas      | 0.972                | 0.973            | Very Good         |
| Florida    | 0.994                | 0.995            | Very Good         |
| Combined   | 0.91                 | 0.91             | Very Good         |

**Table S3.** Percent contribution and permutation importance for all variables in all models. Percent contribution is found by keeping track of the importance that each variable is having during the model training process and should be interpreted with caution since it is heuristically defined and can be influenced by multicollinearity. Permutation importance is found for each variable by altering "...values of that variable on training presence and background data [and] are randomly permuted. The model is reevaluated on the permuted data, and the resulting drop in training AUC is shown in the table, normalized to percentages." [62].

| Combined Model                                |                      |                        | California Only                            |                      |                        | Florida Only                                  |                      |                        | Texas Only                                    |                      |                        |
|-----------------------------------------------|----------------------|------------------------|--------------------------------------------|----------------------|------------------------|-----------------------------------------------|----------------------|------------------------|-----------------------------------------------|----------------------|------------------------|
| Variable                                      | Percent Contribution | Permutation Importance | Variable                                   | Percent Contribution | Permutation Importance | Variable                                      | Percent Contribution | Permutation Importance | Variable                                      | Percent Contribution | Permutation Importance |
| Population_Density250                         | 57.9                 | 0.6                    | Bio14_250—Precipitation of Driest Month    | 36.8                 | 0.8                    | Bio11_250—Mean Temperature of Coldest Quarter | 74.5                 | 78.2                   | Bio01_250—Annual Mean Temperature             | 50.7                 | 93.3                   |
| Bio15_250—Precipitation Seasonality           | 7.9                  | 0.6                    | Population_Density250                      | 27.8                 | 0.7                    | Bio01_250—Annual Mean Temperature             | 7.2                  | 5.3                    | Population_Density250                         | 24.9                 | 0.6                    |
| Bio01_250—Annual Mean Temperature             | 5.9                  | 0.6                    | Bio15_250—Precipitation Seasonality        | 17.5                 | 4.7                    | Population_Density250                         | 6.9                  | 0.6                    | Bio11_250—Mean Temperature of Coldest Quarter | 6.4                  | 0.0                    |
| Bio04_250—Temperature Seasonality             | 5.1                  | 93.2                   | Bio18_250—Precipitation of Warmest Quarter | 3.1                  | 0.2                    | Bio13_250—Precipitation of Wettest Month      | 2.4                  | 0.5                    | Bio18_250—Precipitation of Warmest Quarter    | 3.4                  | 1.9                    |
| Bio06_250—Min Temperature                     | 5.1                  | 0.5                    | Bio02_250—Mean Diurnal Range               | 2.5                  | 0.0                    | Bio18_250—Precipitation of Warmest Quarter    | 2.2                  | 0.9                    | Bio06_250—Min Temperature                     | 3.3                  | 1.0                    |
| Bio07_250—Temperature Annual Range            | 4.1                  | 0.3                    | Bio05_250—Max Temperature                  | 2.1                  | 0.0                    | Bio06_250—Min Temperature                     | 1.3                  | 1.8                    | Bio07_250—Temperature Annual Range            | 2.8                  | 0.0                    |
| Bio11_250—Mean Temperature of Coldest Quarter | 3.1                  | 1.8                    | Bio17_250—Precipitation of Driest Quarter  | 1.7                  | 0.3                    | Bio16_250—Precipitation of Wettest Quarter    | 0.7                  | 0.0                    | Bio05_250—Max Temperature                     | 1.9                  | 0.0                    |
| Bio10_250—Mean Temperature of Warmest Quarter | 2.5                  | 0.1                    | Bio04_250—Temperature Seasonality          | 1.7                  | 0.0                    | Bio08_250—Mean Temperature of Wettest Quarter | 0.7                  | 0.5                    | Bio17_250—Precipitation of Driest Quarter     | 1.7                  | 0.3                    |

|                                                        |     |     |                                                     |     |      |                                                     |     |      |                                                     |     |     |
|--------------------------------------------------------|-----|-----|-----------------------------------------------------|-----|------|-----------------------------------------------------|-----|------|-----------------------------------------------------|-----|-----|
| Bio02_250—<br>Mean Diurnal<br>Range                    | 1.6 | 0.0 | Bio06_250—Min<br>Temperature                        | 1.1 | 83.6 | NLCD_2016_Lan<br>dCover250                          | 0.6 | 0.2  | Bio08_250—Mean<br>Temperature of<br>Wettest Quarter | 1.3 | 0.0 |
| Bio05_250—<br>Max<br>Temperature                       | 1.3 | 0.0 | NLCD_2016_Land<br>Cover250                          | 0.9 | 0.3  | Bio03_250—<br>Isothermality                         | 0.6 | 0.0  | Bio02_250—Mean<br>Diurnal Range                     | 0.6 | 2.3 |
| Bio09_250—<br>Mean<br>Temperature of<br>Driest Quarter | 1.1 | 0.3 | Bio10_250—Mean<br>Temperature of<br>Warmest Quarter | 0.7 | 0.3  | Bio05_250—Max<br>Temperature                        | 0.5 | 0.0  | Bio15_250—<br>Precipitation<br>Seasonality          | 0.6 | 0.3 |
| NLCD_2016_L<br>andCover250                             | 1.3 | 0.1 | Bio19_250—<br>Precipitation of<br>Coldest Quarter   | 1.0 | 4.4  | Bio12_250—<br>Annual<br>Precipitation               | 0.6 | 11.5 | NLCD_2016_Imper<br>vious250                         | 0.6 | 0.0 |
| Bio03_250—<br>Isothermality                            | 0.7 | 0.0 | Bio01_250—<br>Annual Mean<br>Temperature            | 0.6 | 0.2  | Bio07_250—<br>Temperature<br>Annual Range           | 0.3 | 0.0  | Bio10_250—Mean<br>Temperature of<br>Warmest Quarter | 0.5 | 0.0 |
| NLCD_2016_Tr<br>eeCanopy250                            | 0.4 | 0.0 | Bio11_250—Mean<br>Temperature of<br>Coldest Quarter | 0.6 | 0.1  | Bio10_250—Mean<br>Temperature of<br>Warmest Quarter | 0.3 | 0.0  | Bio09_250—Mean<br>Temperature of<br>Driest Quarter  | 0.3 | 0.0 |
| Bio14_250—<br>Precipitation of<br>Driest Month         | 0.4 | 0.0 | Bio03_250—<br>Isothermality                         | 0.6 | 0.0  | Bio09_250—Mean<br>Temperature of<br>Driest Quarter  | 0.3 | 0.0  | GAPlandfire250                                      | 0.3 | 0.0 |
| Bio18_250—<br>Precipitation of<br>Warmest<br>Quarter   | 0.4 | 1.3 | NLCD_2016_Impe<br>rvious250                         | 0.4 | 0.0  | Bio04_250—<br>Temperature<br>Seasonality            | 0.3 | 0.0  | Bio03_250—<br>Isothermality                         | 0.2 | 0.0 |
| Bio12_250—<br>Annual<br>Precipitation                  | 0.2 | 0.0 | GAPlandfire250                                      | 0.1 | 0.3  | GAPlandfire250                                      | 0.1 | 0.2  | NLCD_2016_Land<br>Cover250                          | 0.1 | 0.0 |
| GAPlandfire25<br>0                                     | 0.2 | 0.0 | Bio09_250—Mean<br>Temperature of<br>Driest Quarter  | 0.3 | 0.1  | Bio14_250—<br>Precipitation of<br>Driest Month      | 0.1 | 0.0  | Bio04_250—<br>Temperature<br>Seasonality            | 0.1 | 0.0 |
| NLCD_2016_I<br>mpervious250                            | 0.3 | 0.0 | Bio07_250—<br>Temperature<br>Annual Range           | 0.3 | 0.0  | Bio02_250—Mean<br>Diurnal Range                     | 0.2 | 0.0  | NLCD_2016_TreeC<br>anopy250                         | 0.1 | 0.0 |
| NDVI_2020_25<br>0                                      | 0.0 | 0.0 | NDVI_2020_250                                       | 0.0 | 0.1  | NDVI_2020_250                                       | 0.0 | 0.0  | Bio19_250—<br>Precipitation of<br>Coldest Quarter   | 0.0 | 0.1 |

|                                                            |     |     |                                                     |     |     |                                                   |     |     |                                                   |     |     |
|------------------------------------------------------------|-----|-----|-----------------------------------------------------|-----|-----|---------------------------------------------------|-----|-----|---------------------------------------------------|-----|-----|
| Bio08_250—<br>Mean<br>Temperature of<br>Wettest<br>Quarter | 0.1 | 0.0 | Bio08_250—Mean<br>Temperature of<br>Wettest Quarter | 0.1 | 0.6 | NLCD_2016_Imp<br>ervious250                       | 0.1 | 0.1 | NDVI_2020_250                                     | 0.0 | 0.0 |
| Bio16_250—<br>Precipitation of<br>Wettest<br>Quarter       | 0.1 | 0.3 | Bio16_250—<br>Precipitation of<br>Wettest Quarter   | 0.0 | 0.0 | Bio15_250—<br>Precipitation<br>Seasonality        | 0.0 | 0.1 | Bio14_250—<br>Precipitation of<br>Driest Month    | 0.0 | 0.0 |
| Bio19_250—<br>Precipitation of<br>Coldest<br>Quarter       | 0.2 | 0.0 | Bio12_250—<br>Annual<br>Precipitation               | 0.1 | 3.3 | Bio17_250—<br>Precipitation of<br>Driest Quarter  | 0.1 | 0.0 | Bio13_250—<br>Precipitation of<br>Wettest Month   | 0.0 | 0.0 |
| Bio17_250—<br>Precipitation of<br>Driest Quarter           | 0.0 | 0.0 | Bio13_250—<br>Precipitation of<br>Wettest Month     | 0.0 | 0.0 | NLCD_2016_Tree<br>Canopy250                       | 0.0 | 0.0 | Bio16_250—<br>Precipitation of<br>Wettest Quarter | 0.0 | 0.0 |
| Bio13_250—<br>Precipitation of<br>Wettest Month            | 0.0 | 0.0 | NLCD_2016_Tree<br>Canopy250                         | 0.0 | 0.0 | Bio19_250—<br>Precipitation of<br>Coldest Quarter | 0.0 | 0.0 | Bio12_250— Annual<br>Precipitation                | 0.0 | 0.0 |
